# Supplementary material for: Are differences in travel time or distance to healthcare for adults in global north countries associated with an impact on health outcomes? A systematic review
Source: PubMed Central journal article supplement (PMC5178808; doi:10.1136/bmjopen-2016-013059), 2016-11-24
Supplement: bmjopen-2016-013059supp.pdf [file bmjopen-2016-013059supp.pdf]

Supplementary file 1: Search Terms for MEDLINE

| <b><u>Intervention/ Comparator terms</u></b>                                          | <b><u>Population accessing Healthcare</u></b> | <b><u>Health Outcomes</u></b>                                                                      |
|---------------------------------------------------------------------------------------|-----------------------------------------------|----------------------------------------------------------------------------------------------------|
| Proximity adj3 health*.ti,ab                                                          | health*adj3 access*.ti,ab                     | Health status.ab,ti                                                                                |
| Proximity adj3 hospital*.ti,ab                                                        | health* adj3 care.ti,ab                       | Health inequal*.ab,ti                                                                              |
| Travel*.ab,ti                                                                         | health* adj3 facilit*.ti,ab                   | “health related quality of life”.ab,ti                                                             |
| Distance*.ab,ti                                                                       | hospital*.ti,ab                               | Hrqol.ab,ti                                                                                        |
| Patient adj3 transport.ti,ab                                                          | inpatient*.ab,ti                              | Mortality.ab,ti                                                                                    |
| Journey*adj5 (car or bus or transit or transport* or public transport or train).ti,ab | outpatient*.ti,ab                             | Delay* adj3 diagnosis.ab,ti                                                                        |
| Time to hospital*.ab,ti                                                               | health* adj3 appoint*.ab,ti                   | Late* adj3 diagnosis.ab,ti                                                                         |
| Transportation of patients/                                                           | rural adj3 health*.ab,ti                      | Miss*adj3 appoint*.ab,ti                                                                           |
| Travel/                                                                               | urban adj3 health*.ab,ti                      | Health adj3 outcome.ab,ti                                                                          |
|                                                                                       | communit* adj3 health*.ti,ab                  | Quality of life.ab,ti                                                                              |
|                                                                                       | primary health*.ab,ti                         | Self reported health.ab,ti                                                                         |
|                                                                                       | family practice.ab,ti                         | Prognosis.ab,ti                                                                                    |
|                                                                                       | gen* pract*.ab,ti                             | Complete adj3 treatment.ab,ti                                                                      |
|                                                                                       | health* adj3 screen*.ti,ab                    | Did not attend.ab,ti                                                                               |
|                                                                                       | clinic.ab,ti or clinics.ab,ti                 | Health status/ or health status disparities/                                                       |
|                                                                                       | GP.ab,ti                                      | *“Quality of life”/ or patient compliance/ or patient refusal/ or diagnosis/ or delayed diagnosis/ |
|                                                                                       | “accident and emergency”.ab,ti                | Mortality/                                                                                         |
|                                                                                       | health services accessibility/                | Prognosis/                                                                                         |

|  |                                                                                                                                                                                                                                                                                                                                                                                                                      |                                            |
|--|----------------------------------------------------------------------------------------------------------------------------------------------------------------------------------------------------------------------------------------------------------------------------------------------------------------------------------------------------------------------------------------------------------------------|--------------------------------------------|
|  | hospitals/ or hospitals, community/ or hospitals, general/ or hospitals, group practice/ or hospitals, high-volume/ or hospitals, low-volume/ or hospitals, private/ or hospitals, public/ or hospitals, rural/ or hospitals, satellite/ or hospitals, special/ or hospitals, teaching/ or hospitals, urban/ or mobile health units/ or secondary care centers/ or tertiary care centers/Appointments and schedules/ | Treatment adj3 retention.ab,ti             |
|  | Mass screening/                                                                                                                                                                                                                                                                                                                                                                                                      | <u>Treatment adj3 follow adj3 up.ab,ti</u> |
|  | Urban health/                                                                                                                                                                                                                                                                                                                                                                                                        | <u>Patient complian*.ab,ti</u>             |
|  | Rural health/                                                                                                                                                                                                                                                                                                                                                                                                        |                                            |
|  | Health services/ or primary healthcare/ or general practice/ or tertiary healthcare/                                                                                                                                                                                                                                                                                                                                 |                                            |
|  | Emergency service, hospital/                                                                                                                                                                                                                                                                                                                                                                                         |                                            |

|              |                                           |
|--------------|-------------------------------------------|
| Restrictions | NOT exercise test/ or exercise test.ab,ti |
|              | English Language                          |
